# Supplementary material
Source: PubMed Central journal article supplement (PMC11626266)
Supplement: ajcr0014-5551-f7.pdf [file ajcr0014-5551-f7.pdf]

# Cellular MSI-H score predicts immunotherapy outcome

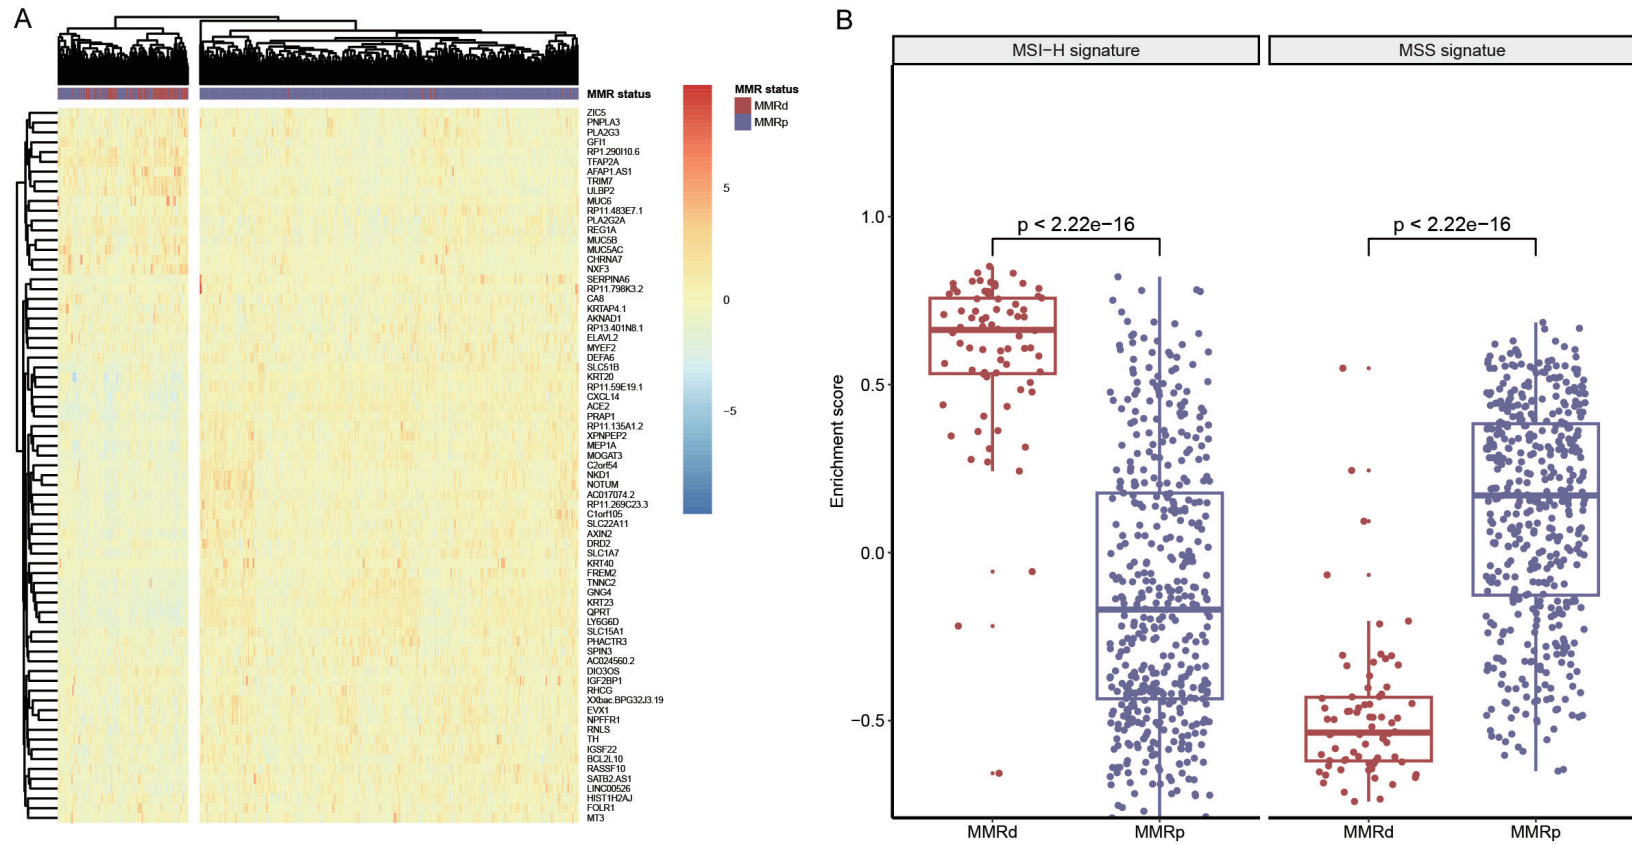

**Supplementary Figure 1.** Validating the molecular MSI-H and MSS signature in the independent dataset, GSE39582. A. Unsupervised clustering distinguishes MMRd from MMRp samples. B. Difference of MSI-H and MSS enrichment score between MMRd and MMRp samples.

# Cellular MSI-H score predicts immunotherapy outcome

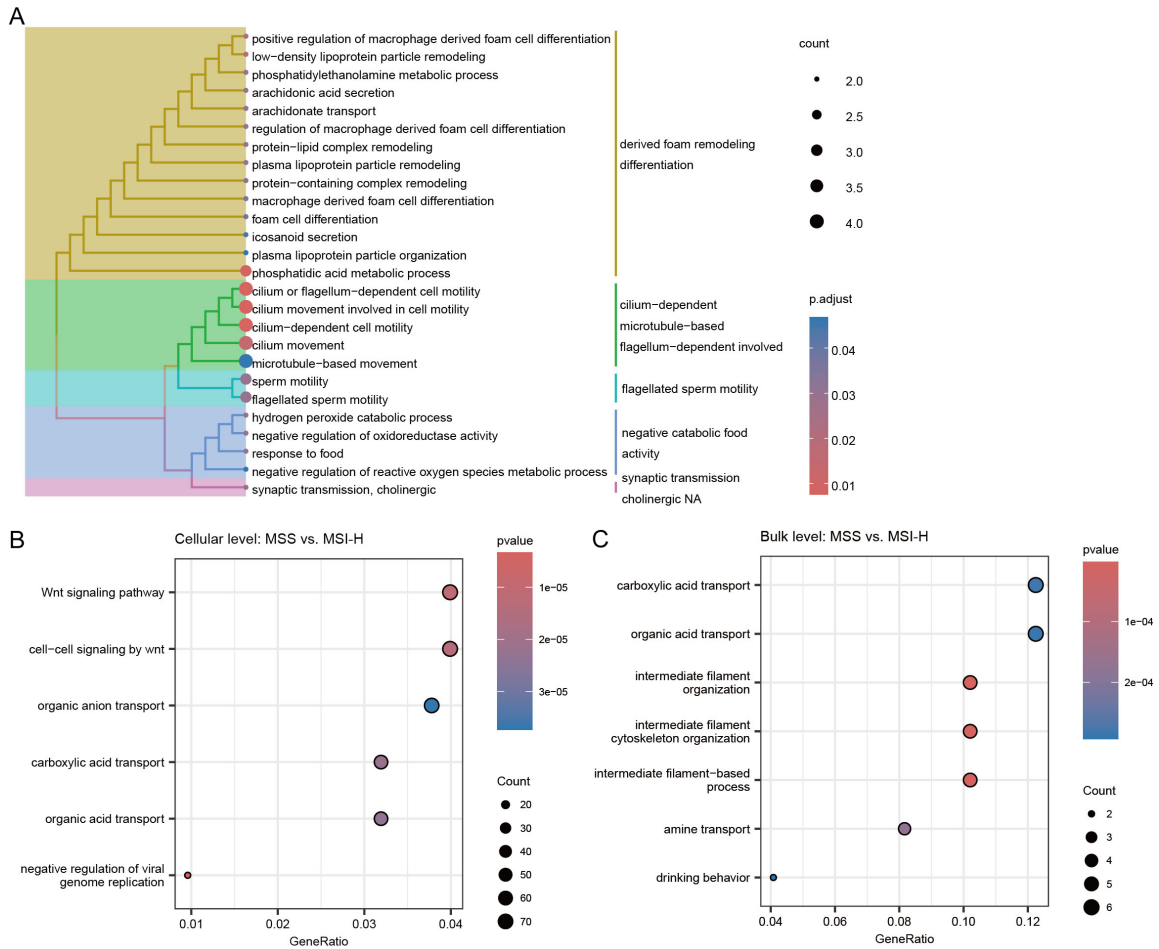

**Supplementary Figure 2.** Enrichment analysis against GO biological process terms for genes up-regulated in bulk MSI-H tissues compared to bulk MSS tissues (A), in MSS cells compared to MSI-H cells (B), and in bulk MSS tissues compared to bulk MSI-H tissues (C).
